# Supplementary material
Source: publisher site journal article supplement (https://www.spandidos-publications.com/6913/downloadSupplementary)
Supplement: Supplementary file 1 [file downloadSupplementary]

Figure S1. Generation and validation of the anti-CK2 $\alpha$  antibody. Sequential screening of mouse hybridoma clones was performed by western blotting. (A and B) More than six clones with high affinity and specificity to CK2 $\alpha$  both *in vitro* and *in vivo* that did not cross-react with CK2 $\alpha$  were selected. (C) The protein A-purified IgG fraction derived from a hybridoma clone 6A3, subclass mouse IgG2b  $\kappa$ , was used in the present study. CK2 $\alpha$ , casein kinase 2 alpha.

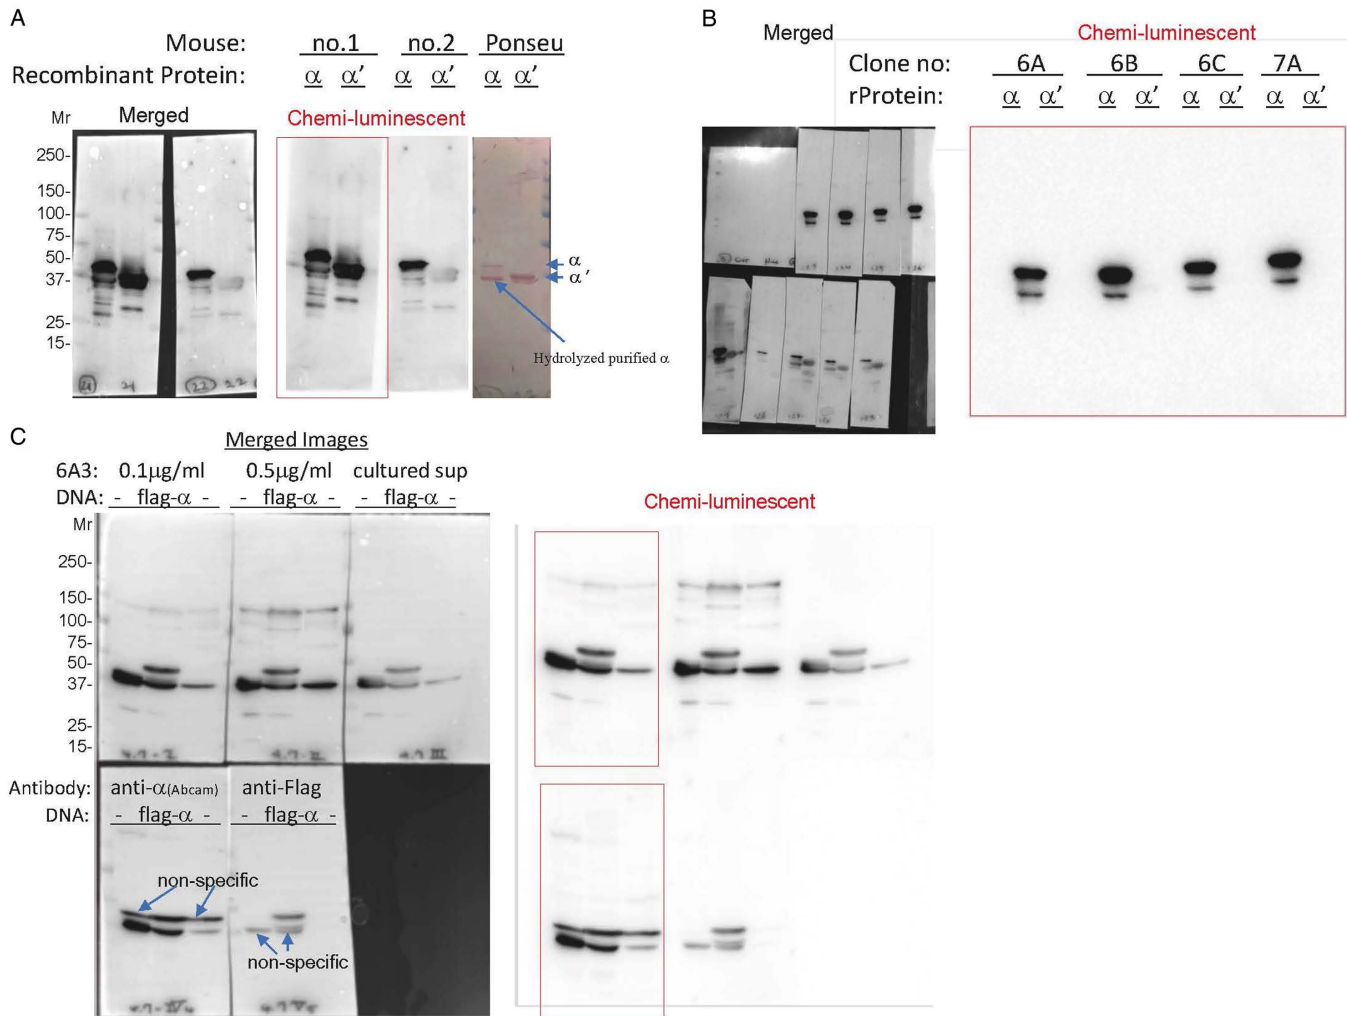

Figure S2. Nucleolar CK2 $\alpha$  staining is associated with poor prognosis in patients with surgically resected stage IA1 to IA2 lung adenocarcinoma. RFS was stratified by nucleolar CK2 $\alpha$  positive (IV, V) or negative (II, III) staining. Differences between categories were analyzed by the log-rank test. CK2 $\alpha$ , casein kinase 2 alpha; RFS, recurrence-free survival.

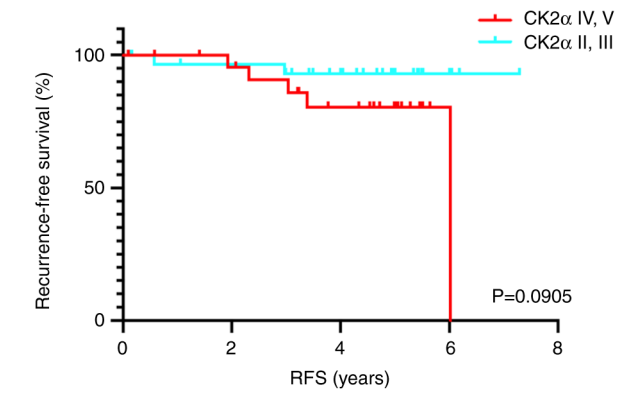

| No. at risk          |    | 0  | 1  | 2  | 3  | 4  | 5 | 6 | 7 | 8 |
|----------------------|----|----|----|----|----|----|---|---|---|---|
| CK2 $\alpha$ II, III | 31 | 29 | 28 | 26 | 22 | 12 | 5 | 2 |   |   |
| CK2 $\alpha$ IV, V   | 25 | 24 | 22 | 20 | 15 | 9  | 2 | 0 |   |   |
